# Supplementary material
Source: PubMed Central journal article supplement (PMC7189429)
Supplement: cs9b04471_si_001.pdf [file cs9b04471_si_001.pdf]

## **Dynamics of a Key Conformational Transition in the Mechanism of Peroxiredoxin Sulfinylation**

by

Alexandre Kriznik<sup>1,2</sup>, Marouane Libiad<sup>3</sup>, H el ene Le Cordier<sup>1</sup>, Samia Boukhenouna<sup>1</sup>, Michel B  
Toledano<sup>3</sup> & Sophie Rahuel-Clermont<sup>1,2\*</sup>

<sup>1</sup> IMoPA, Universit e de Lorraine, CNRS, Biopole, Campus Biologie Sant e, F-54000 Nancy, France

<sup>2</sup> UMS2008 IBSLor, Biophysics and Structural Biology core facility, Universit e de Lorraine,  
CNRS, INSERM, Biopole, Campus Biologie Sant e, F-54000 Nancy, France

<sup>3</sup> Institute for Integrative Biology of the Cell (I2BC), UMR9198, CNRS, CEA-Saclay, Universit e  
Paris-Saclay, iBiTecS/SBIGEM, Laboratoire Stress oxydant et Cancer, Bat 142, F-91198 Gif-sur-  
Yvette Cedex, France

\* E-mail: [sophie.rahuel@univ-lorraine.fr](mailto:sophie.rahuel@univ-lorraine.fr)

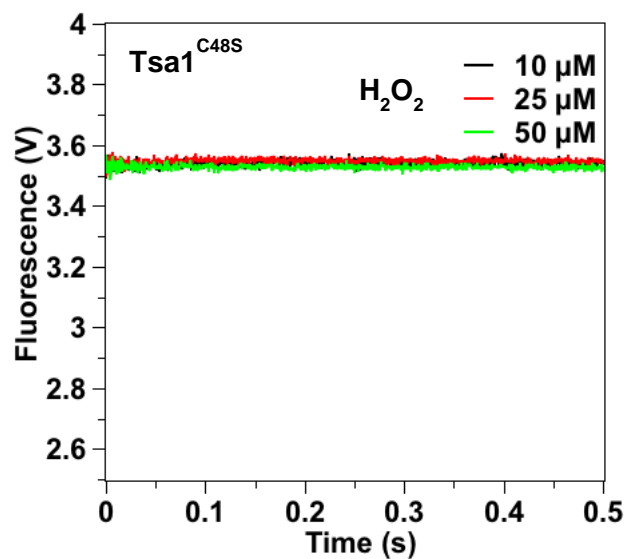

**Figure S1.** Pre-steady state kinetics for the reaction of Tsa1<sup>C48S</sup> (5 μM) with increasing H<sub>2</sub>O<sub>2</sub> (10, 25, 50 μM) monitored by Trp fluorescence as in Fig. 2b.

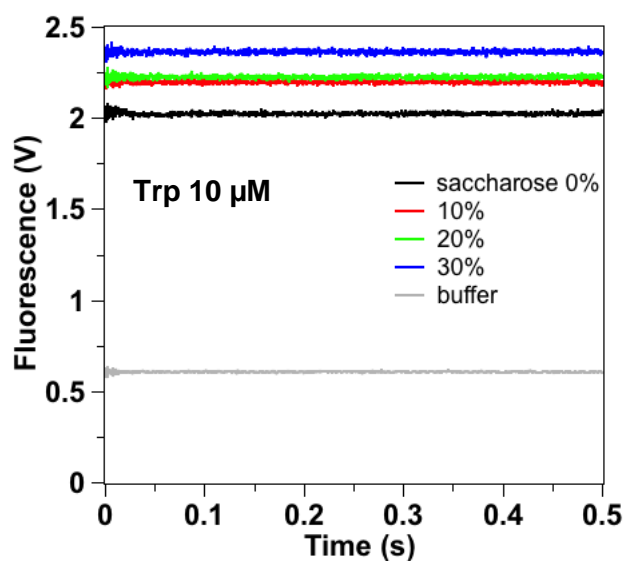

**Figure S2.** Test of stop flow mixer efficiency in viscous solutions, based on the effect of saccharose (0% black, 10 % red, 20% green and 30% blue) on Trp amino-acid fluorescence (10 μM) monitored as in Fig. 2b.

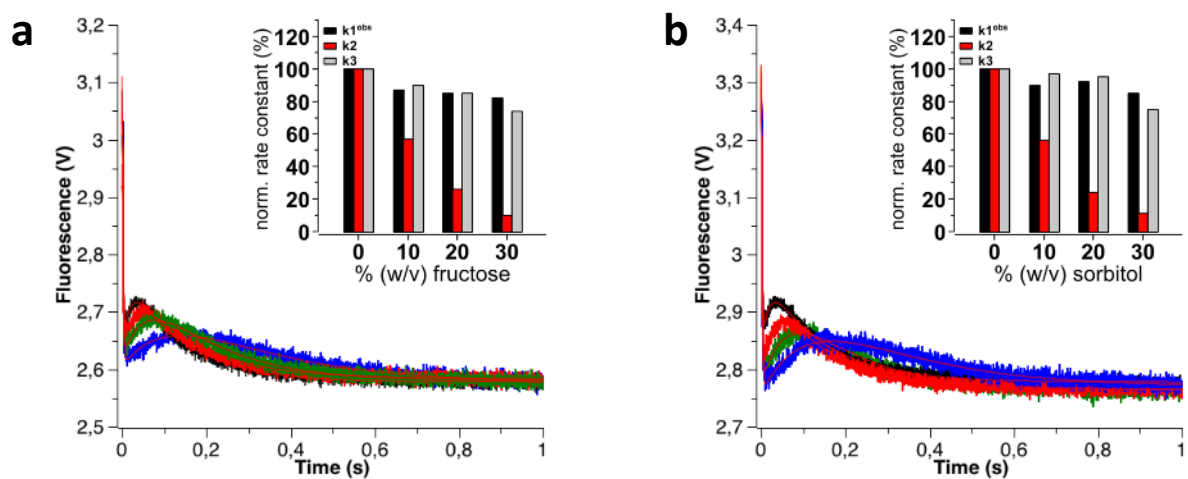

**Figure S3.** Effect of viscogens fructose (a) and sorbitol (b) (0% black, 10 % red, 20% green and 30% blue) on the reaction of Tsa1 (5  $\mu$ M) with H<sub>2</sub>O<sub>2</sub> (10  $\mu$ M) monitored as in Fig. 2, fitted against a 3-exponential equation (red lines). Insets, effect of viscogen concentration on rate constants  $k_1^{obs}$ ,  $k_2$  and  $k_3$  normalized to 0% viscogen.

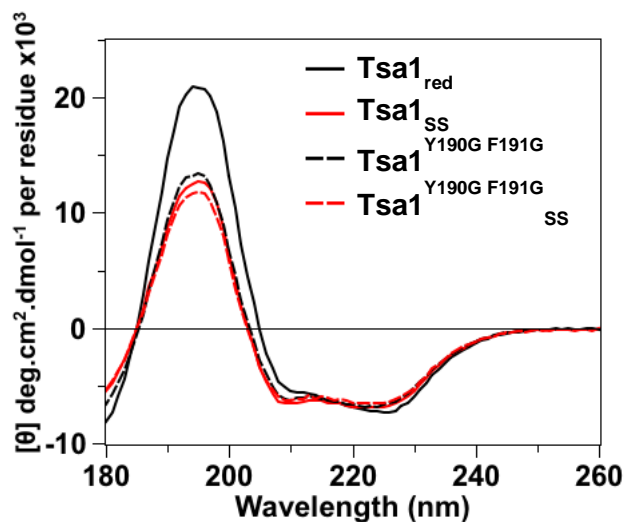

**Figure S4.** Far-UV CD spectra of 5  $\mu$ M wild-type Tsa1 (plain) and Tsa1<sup>Y190G F191G</sup> (dash line) under the reduced (black) and disulfide (red) forms. Measurements were performed in a 0.01 cm flat cell in phosphate (10 mM) NaF (100 mM) buffer pH 7 and are the average of three records.

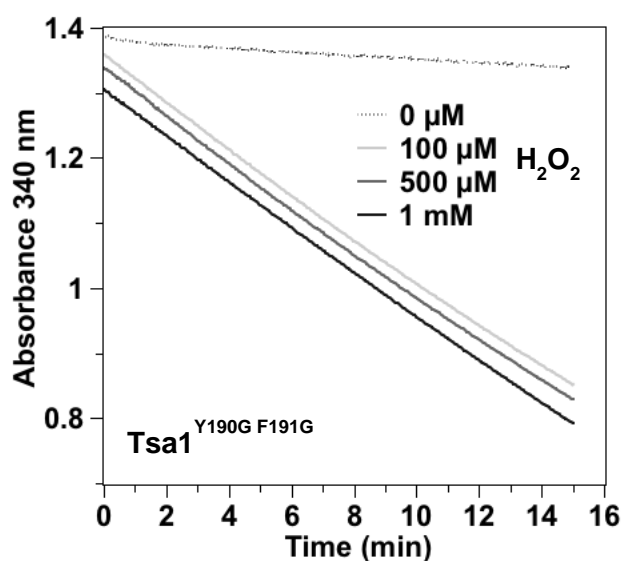

**Figure S5.** Steady state kinetics for the determination of the hyperoxidation sensitivity of Tsa1<sup>Y190G F191G</sup> with H<sub>2</sub>O<sub>2</sub> monitored by consumption of NADPH (200 μM) at 340 nm in the presence *E. coli* thioredoxin reductase (0.25 μM), *E. coli* Trx1 (5 μM), Tsa1 (1 μM) and variable amounts of H<sub>2</sub>O<sub>2</sub> (from 100 μM to 1 mM) in TK buffer. The time courses have been shifted on the y-axis for clarity.

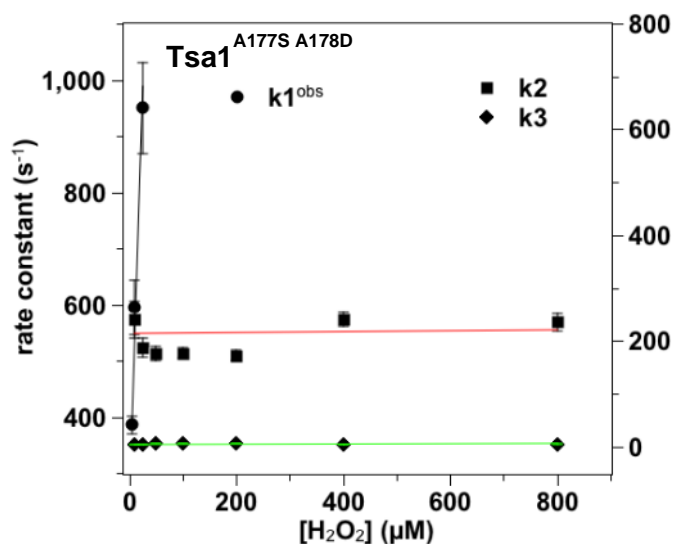

**Figure S6.** Second order plots and linear fits of the observed rate constants  $k_1^{obs}$  (circles, black line),  $k_2$  (squares, red line) and  $k_3$  (diamond, green line) for Tsa1<sup>A177S A178D</sup> reaction kinetics with H<sub>2</sub>O<sub>2</sub>.

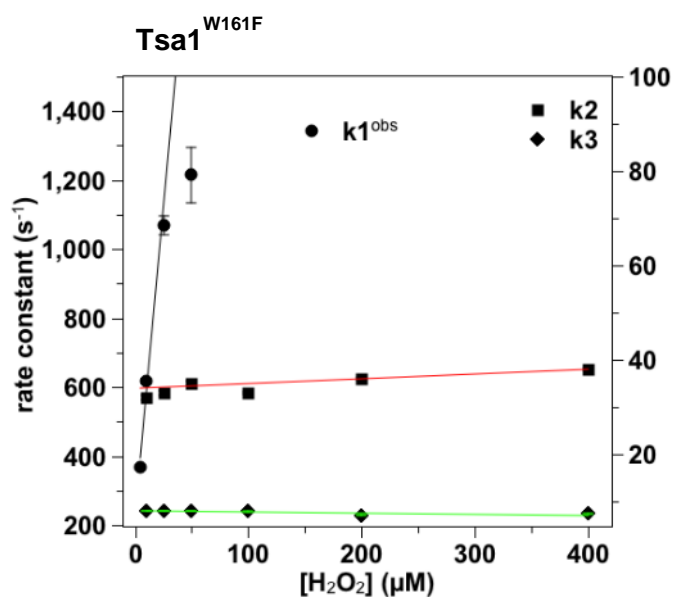

**Figure S7.** Second order plots and linear fits of the observed rate constants  $k1^{obs}$  (circles, black line),  $k2$  (squares, red line) and  $k3$  (diamond, green line) for  $Tsa1^{W161F}$  reaction kinetics with  $H_2O_2$ .

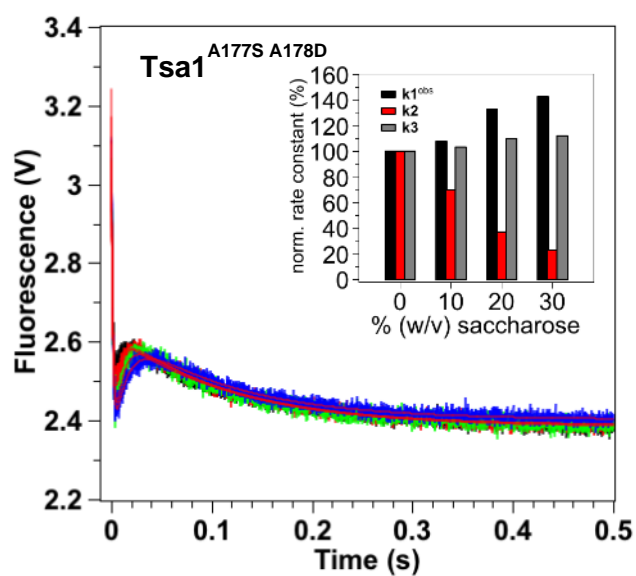

**Figure S8.** Effect of saccharose (0% black, 10 % red, 20% green and 30% blue) on the reaction of  $Tsa1^{A177S A178D}$  ( $5 \mu M$ ) with  $H_2O_2$  ( $10 \mu M$ ) monitored as in Fig. 2b, fitted against a 3-exponential equation (red line). Inset, effect of saccharose concentration on rate constants  $k1^{obs}$ ,  $k2$  and  $k3$  normalized to 0% saccharose.

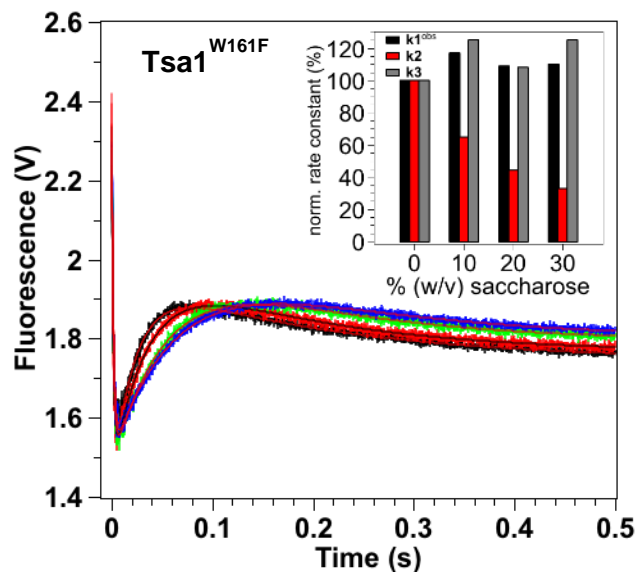

**Figure S9.** Effect of saccharose (0% black, 10 % red, 20% green and 30% blue) on the reaction of Tsa1<sup>W161F</sup> (5  $\mu$ M) with H<sub>2</sub>O<sub>2</sub> (10  $\mu$ M) monitored as in Fig. 2b, fitted against a 3-exponential equation (red or black line). Inset, effect of saccharose concentration on rate constants  $k1^{obs}$ ,  $k2$  and  $k3$  normalized to 0% saccharose.

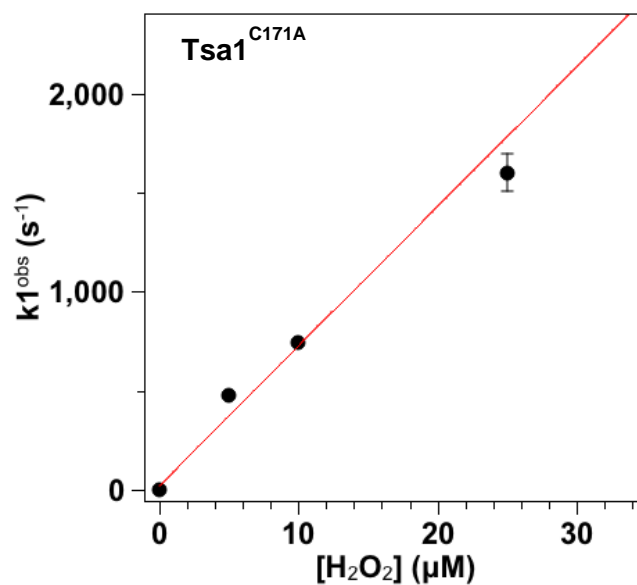

**Figure S10.** Second order plot and linear fit of the observed rate constants  $k1^{obs}$  vs H<sub>2</sub>O<sub>2</sub> concentration, for the reaction kinetics of Tsa1<sup>C171A</sup> with H<sub>2</sub>O<sub>2</sub>.

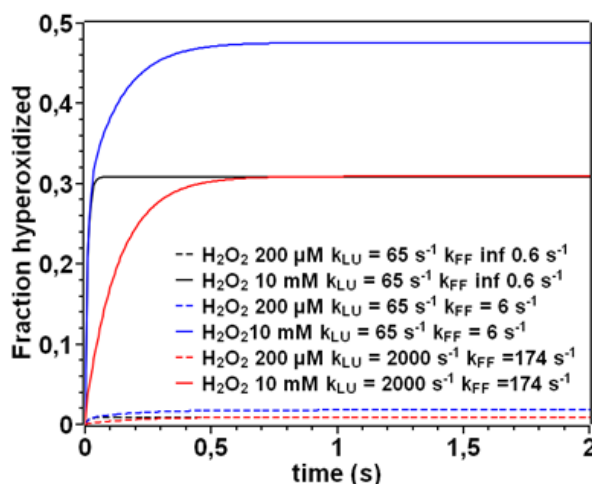

**Figure S11. Simulation of the kinetics of formation of Tsa1<sub>SO2</sub>.** Simulations were performed based on the model from Figure 6b, using the fitted rate constants values  $k_{\text{SOH}}$  and  $k_{\text{SO2}}$  reported in Table 1 and the indicated values for  $k_{\text{LU}}$ ,  $k_{\text{FF}}$  and  $\text{H}_2\text{O}_2$  concentrations. Using fluorescence intensity factors of 62 and 124 % for Tsa1<sub>SS</sub> and Tsa1<sub>SO2</sub> respectively (Figure 2a), the fraction of Tsa1 in each state at completion of the reaction was estimated from Figure 6a data. At  $\text{H}_2\text{O}_2$  concentrations of 200  $\mu\text{M}$  and 10 mM, Tsa1<sub>SO2</sub> contributes to 1% and 30 % of the total, and Tsa1<sub>SS</sub> the remainder up to 100 % (black lines). Fixing  $k_{\text{LU}}$  at the fitted value of 65  $\text{s}^{-1}$  and setting  $k_{\text{FF}}$  to values higher than 0.6  $\text{s}^{-1}$  increased the hyperoxidized fraction to values incompatible with experimental observations. For instance, with  $k_{\text{FF}} = 6 \text{ s}^{-1}$  Tsa1<sub>SO2</sub> reaches 2 and 48 % at 200  $\mu\text{M}$  and 10 mM  $\text{H}_2\text{O}_2$ , respectively (blue lines). This supports that  $k_{\text{FF}} \ll k_{\text{LU}}$ .

To simulate the  $\text{Tsa1}^{\text{FF}}\text{--SOH} \rightleftharpoons \text{Tsa1}^{\text{LU}}\text{--SOH}$  in rapid equilibrium,  $k_{\text{LU}}$  was set at 2000  $\text{s}^{-1}$ , in which case fractions of Tsa1<sub>SO2</sub> consistent with observation were obtained for  $k_{\text{FF}} = 174 \text{ s}^{-1}$  (red lines). However in this case the FF to LU conformational event would be too fast to be observed in fluorescence, and the rate constant of Tsa1<sub>SO2</sub> formation would be of  $\sim 5 \text{ s}^{-1}$ , i.e., mostly controlled by  $k_{\text{SS}}$ .

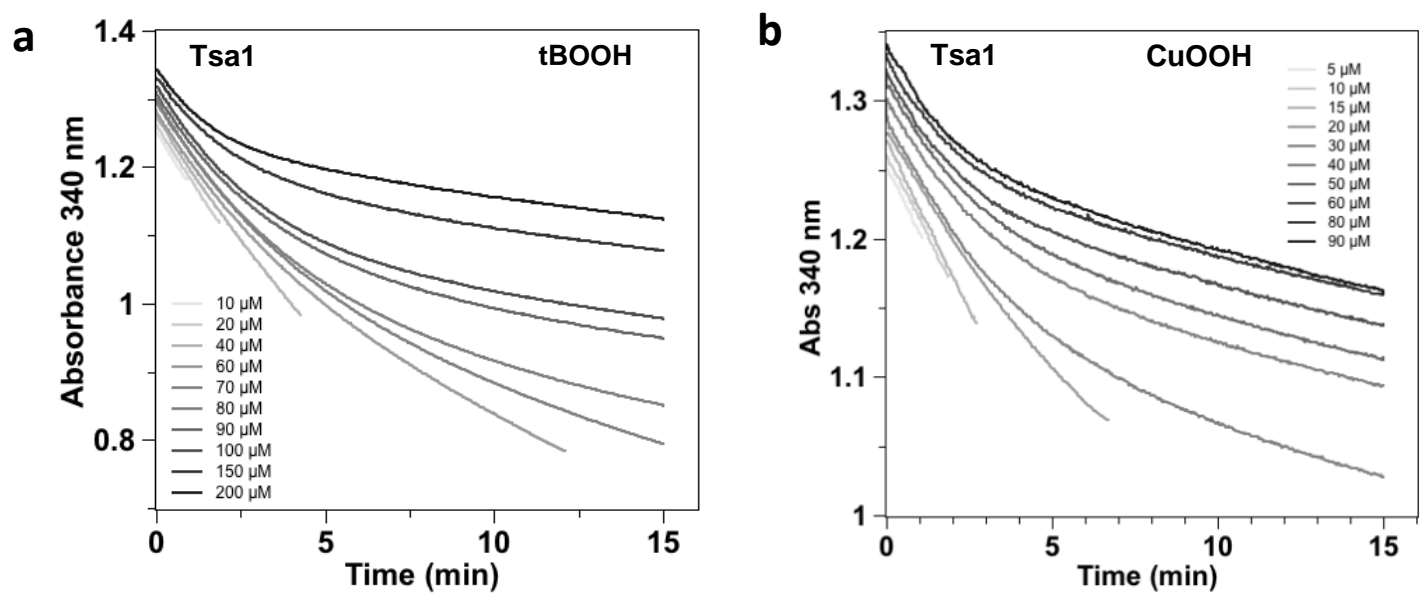

**Figure S12.** Steady state kinetics for the determination of hyperoxidation sensitivity of Tsa1 with tBOOH monitored by consumption of NADPH (200  $\mu\text{M}$ ) at 340 nm in the presence thioredoxin reductase (0.25  $\mu\text{M}$ ), Trx1 (5  $\mu\text{M}$ ), Tsa1 (1  $\mu\text{M}$ ) and variable amounts of (a) tBOOH (from 10 to 200  $\mu\text{M}$  as indicated), and (b) CuOOH (as indicated). The time courses have been shifted on the  $\gamma$ -axis for clarity.



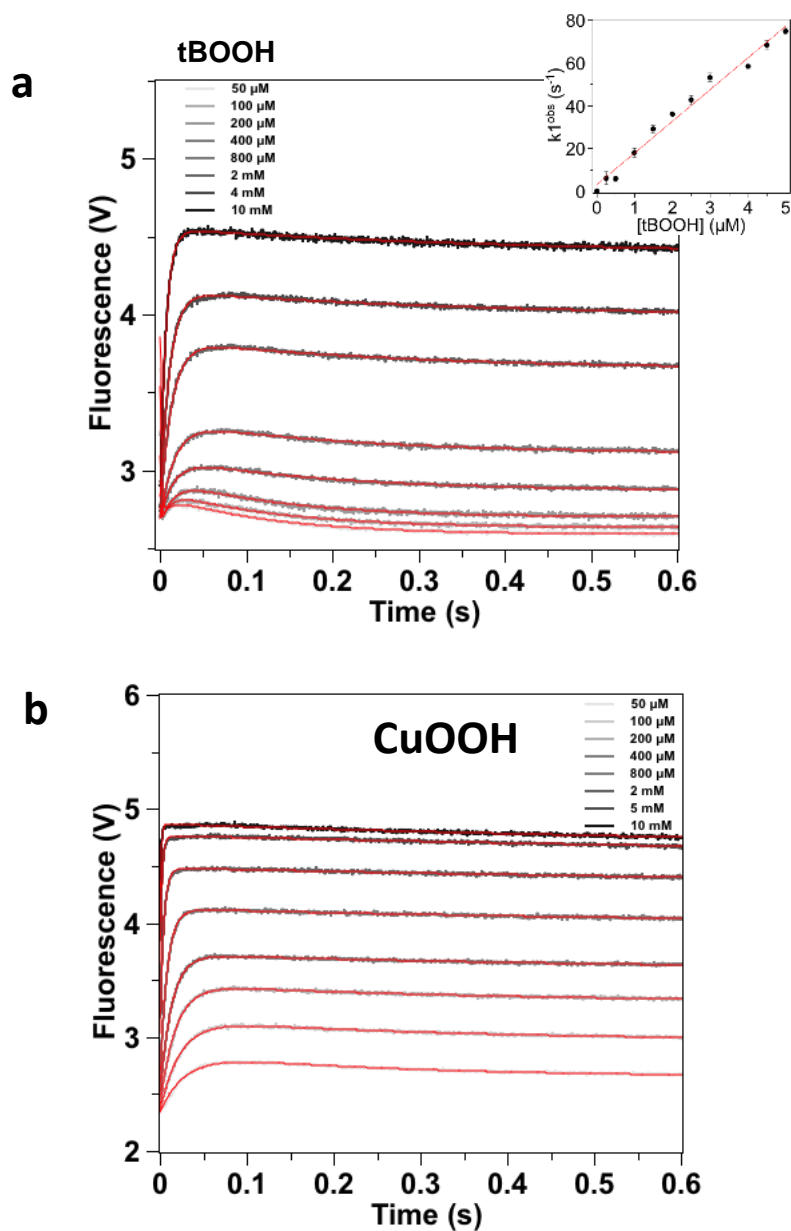

**Figure S13.** a. Pre-steady state kinetics for the reaction of Tsa1 (5  $\mu$ M) with tBOOH (as indicated) monitored as in Fig. 2B, fitted against a multiexponential equation (red line). Inset, precise determination of  $k_1$  by second order plot and linear fit of the rate constants  $k_1^{obs}$  obtained from kinetics measured for the reaction of Tsa1 (0.5  $\mu$ M) with low tBOOH concentrations (from 0.5 to 5  $\mu$ M). b. Pre-steady state kinetics for the reaction of Tsa1 (5  $\mu$ M) with CuOOH (as indicated) monitored as in Fig. 2B, fitted against a multiexponential equation (red line).

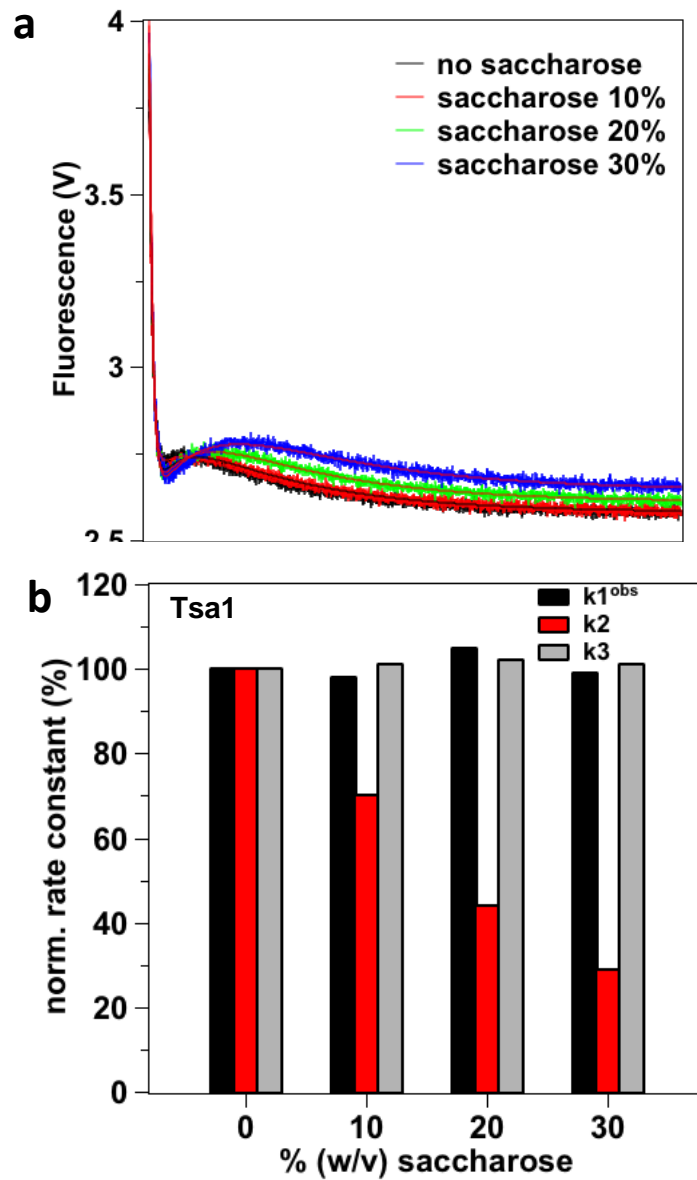

**Figure S14.** a, effect of saccharose (0% black, 10 % red, 20% green and 30% blue) on the reaction of Tsa1 (5  $\mu$ M) with tBOOH (10  $\mu$ M) monitored as in Fig. 2b, fitted against a 3-exponential equation (red or black line). b, effect of saccharose concentration on rate constants  $k1^{obs}$ ,  $k2$  and  $k3$  normalized to 0% saccharose.

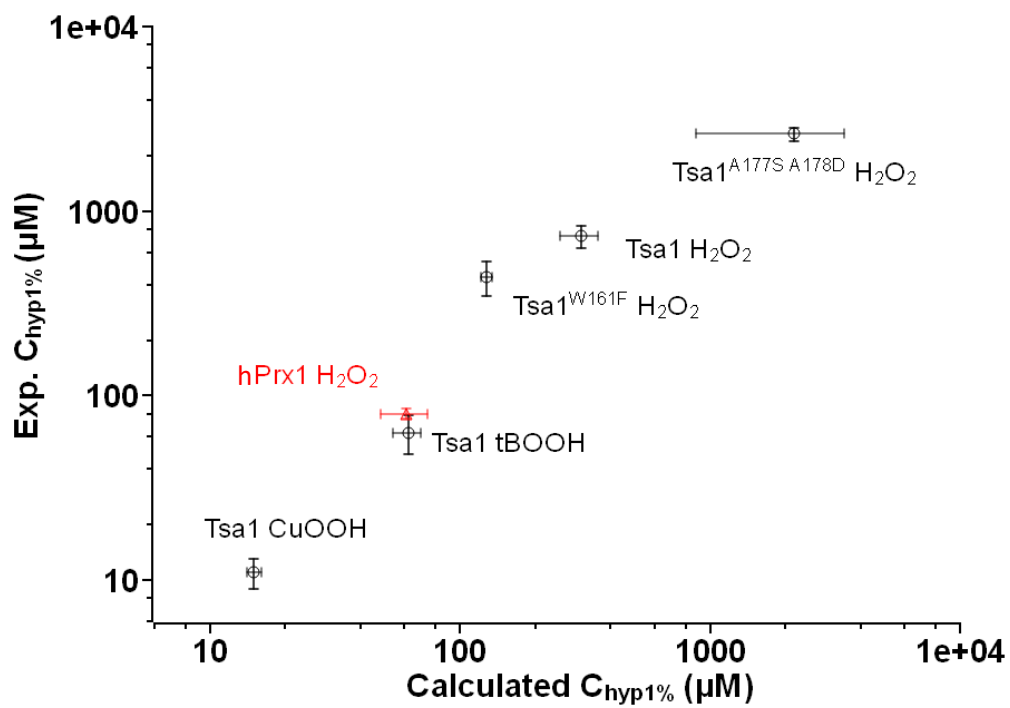

Figure S15. Comparison of the calculated and experimental  $C_{hyp1\%}$  for wild-type and mutant Prxs
